# Supplementary material for: Brew temperature, at fixed brew strength and extraction, has little impact on the sensory profile of drip brew coffee
Source: PubMed Central journal article supplement (PMC7536440; doi:10.1038/s41598-020-73341-4), 2020-10-05
Supplement: 41598_2020_73341_MOESM1_ESM.pdf [file 41598_2020_73341_MOESM1_ESM.pdf]

# **Brew temperature, at fixed brew strength and extraction, has little impact on the sensory profile of drip brew coffee**

Batali, Mackenzie E.<sup>1</sup>, Ristenpart, William D.<sup>2\*</sup>, Guinard, Jean-Xavier<sup>1</sup>

## **Author affiliations**

<sup>1</sup>Department of Food Science and Technology  
University of California, Davis  
One Shields Avenue  
Davis, CA, 95616 USA

<sup>2</sup>Department of Chemical Engineering  
University of California, Davis  
One Shields Avenue  
Davis, CA, 95616 USA

## **\*Corresponding author**

[wdristenpart@ucdavis.edu](mailto:wdristenpart@ucdavis.edu)

## ***Supplementary Figures:***

- S1.** Interaction plots of attributes with significant two-way or three-way interactions.
- S2.** Response surface contour plots of attributes with higher order interactions.
- S3.** Roasting temperature curves.

## ***Supplementary Tables:***

- S1.** Brewing parameters for all samples, with measured temperature, TDS, and PE values.
- S2.** Table of F-ratios from multivariate analysis of variance.
- S3.** F-ratios for univariate analysis of variance.
- S4.** F-ratios for pseudomixed analysis of variance for Judge/TDS effect and Judge/PE effect.
- S5.** Mean intensities for all measured sensory attributes.

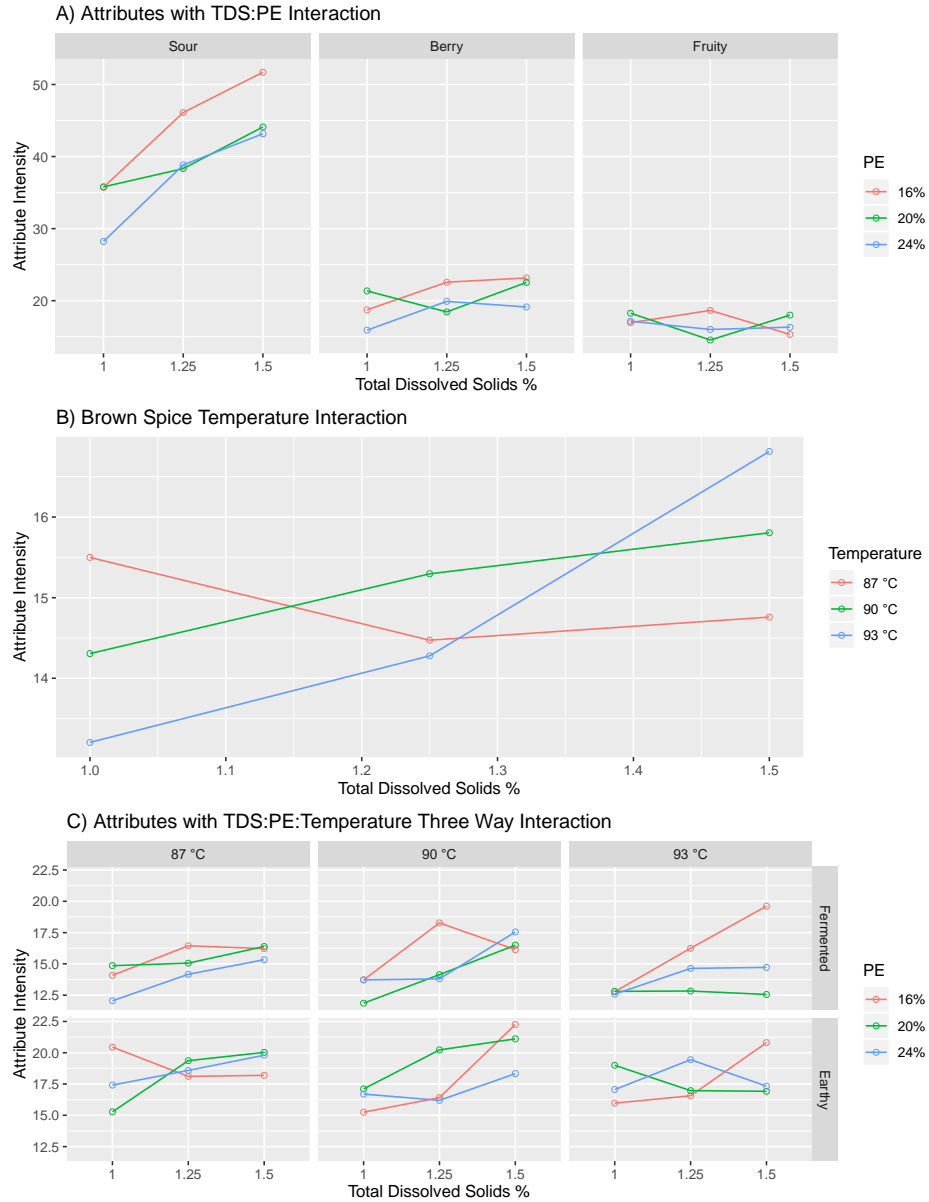

**Supplementary Figure S1.** Interaction plots of attributes with significant two-way (a, b) or three-way (c) interactions.

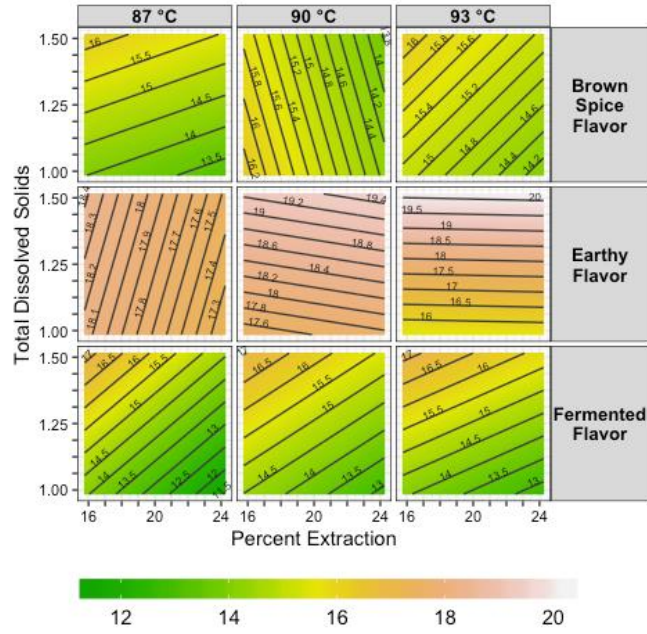

**Supplementary Figure S2.** Response surface methodology contour plots of attributes with Temperature x TDS or Temperature x TDS x PE interactions, to visualize how the interaction effects change the slope of the fit.

|                    |              |                        |          |
|--------------------|--------------|------------------------|----------|
| Roast Area Index   | 222,649.6 °F | End Temperature        | 421.7 °F |
| Development time   | 149 s        | Development time ratio | 21.6 %   |
| Charge Temperature | 468.1 °F     |                        |          |

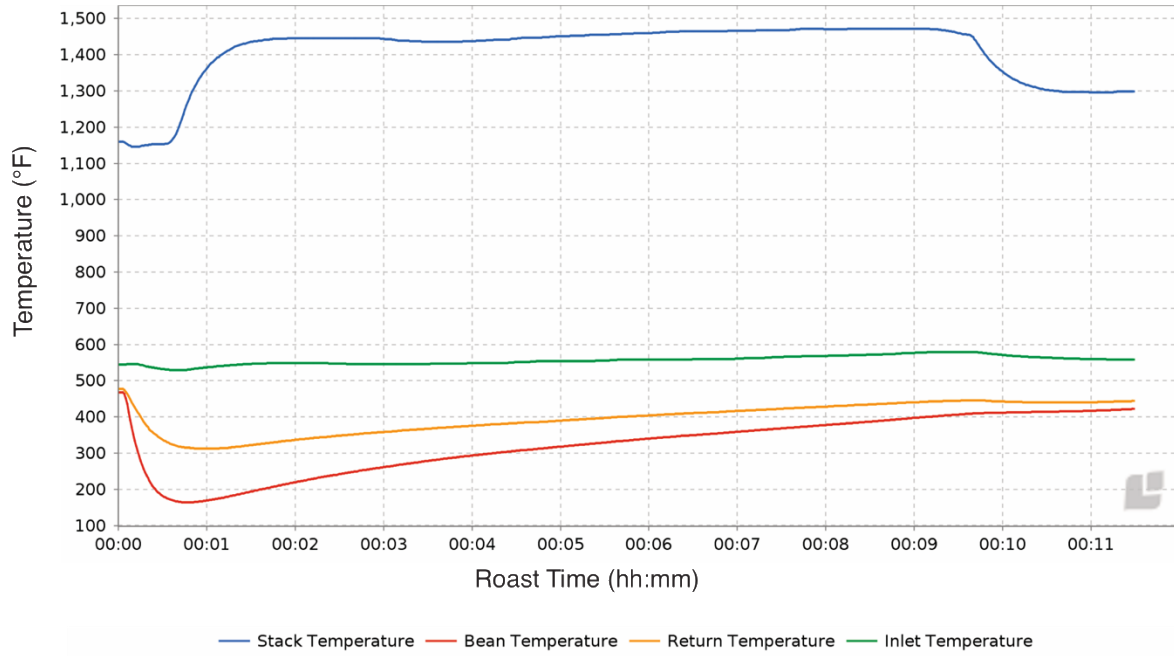

**Supplementary Figure S3.** Roasting temperature curves, as provided by Royal Coffee.

| Target TDS (%) | Target PE (%) | Brew Temp (°C) | Ground coffee mass (g) | Brew Ratio | Grind Size | Brew Duration (m:ss) | Water on (m:ss) | Water off (m:ss) | Water on/off cycles | Temp post-brew (°C) | Mean TDS (%) | Mean PE (%) |
|----------------|---------------|----------------|------------------------|------------|------------|----------------------|-----------------|------------------|---------------------|---------------------|--------------|-------------|
| 1.00           | 16            | 87             | 176.1                  | 17.5       | 5          | 7:00                 | 1:20            | :40              | 2                   | 80.4                | 1.05 ± 0.03  | 16.9 ± 0.58 |
| 1.00           | 16            | 90             | 176.1                  | 17.5       | 5          | 6:44                 | :40             | :16              | 4                   | 82.5                | 1.04 ± 0.02  | 17.0 ± 0.38 |
| 1.00           | 16            | 93             | 176.1                  | 17.5       | 5          | 6:20                 | 1:20            | :20              | 2                   | 85.4                | 1.00 ± 0.02  | 16.0 ± 0.23 |
| 1.00           | 20            | 87             | 145.0                  | 21.2       | 3          | 6:44                 | :40             | :16              | 4                   | 80.6                | 1.00 ± 0.02  | 19.7 ± 1.22 |
| 1.00           | 20            | 90             | 145.0                  | 21.2       | 3          | 6:44                 | :40             | :16              | 4                   | 82.2                | 1.03 ± 0.02  | 20.1 ± 1.28 |
| 1.00           | 20            | 93             | 140.3                  | 21.9       | 3          | 6:12                 | 1:20            | :16              | 2                   | 85.0                | 1.02 ± 0.03  | 19.9 ± 1.99 |
| 1.00           | 24            | 87             | 119.0                  | 25.8       | 3          | 11:00                | :40             | 1:30             | 4                   | 78.4                | 0.99 ± 0.06  | 24.4 ± 1.66 |
| 1.00           | 24            | 90             | 121.1                  | 25.4       | 3          | 9:00                 | :16             | :20              | 10                  | 81.4                | 0.95 ± 0.03  | 22.4 ± 0.95 |
| 1.00           | 24            | 93             | 120.0                  | 25.6       | 3          | 11:00                | :40             | 1:30             | 4                   | 82.3                | 1.08 ± 0.20  | 24.1 ± 5.34 |
| 1.25           | 16            | 87             | 215.3                  | 14.3       | 5          | 7:48                 | :20             | :16              | 8                   | 79.8                | 1.34 ± 0.03  | 17.6 ± 0.31 |
| 1.25           | 16            | 90             | 215.3                  | 14.3       | 5          | 7:00                 | :40             | :20              | 4                   | 82.0                | 1.28 ± 0.11  | 18.0 ± 2.05 |
| 1.25           | 16            | 93             | 215.3                  | 14.3       | 5          | 7:00                 | :40             | :20              | 4                   | 84.8                | 1.34 ± 0.03  | 17.4 ± 0.45 |
| 1.25           | 20            | 87             | 176.1                  | 17.5       | 3          | 7:48                 | :20             | :16              | 8                   | 80.8                | 1.28 ± 0.02  | 20.5 ± 0.56 |
| 1.25           | 20            | 90             | 176.1                  | 17.5       | 3          | 7:48                 | :20             | :16              | 8                   | 81.7                | 1.29 ± 0.04  | 20.5 ± 1.60 |
| 1.25           | 20            | 93             | 176.1                  | 17.5       | 3          | 7:00                 | 1:20            | :40              | 2                   | 84.6                | 1.33 ± 0.02  | 21.1 ± 0.28 |
| 1.25           | 24            | 87             | 150.0                  | 20.5       | 4          | 9:00                 | :16             | :20              | 10                  | 77.5                | 1.28 ± 0.25  | 24.5 ± 4.74 |
| 1.25           | 24            | 90             | 149.0                  | 20.6       | 3          | 11:00                | :40             | 1:30             | 4                   | 80.1                | 1.24 ± 0.11  | 23.4 ± 2.19 |
| 1.25           | 24            | 93             | 150.0                  | 20.5       | 3          | 9:00                 | :16             | :20              | 10                  | 83.6                | 1.23 ± 0.04  | 23.1 ± 0.76 |
| 1.50           | 16            | 87             | 252.7                  | 12.2       | 5          | 7:28                 | :40             | :27              | 4                   | 79.4                | 1.53 ± 0.03  | 16.9 ± 0.31 |
| 1.50           | 16            | 90             | 252.7                  | 12.2       | 5          | 7:28                 | :40             | :27              | 4                   | 80.9                | 1.51 ± 0.12  | 17.8 ± 2.07 |
| 1.50           | 16            | 93             | 265.0                  | 11.7       | 5          | 6:44                 | :40             | :16              | 4                   | 83.9                | 1.60 ± 0.11  | 17.8 ± 2.60 |
| 1.50           | 20            | 87             | 207.6                  | 14.8       | 3          | 7:28                 | :40             | :27              | 4                   | 80.2                | 1.45 ± 0.03  | 19.7 ± 0.25 |
| 1.50           | 20            | 90             | 207.6                  | 14.8       | 3          | 7:28                 | :40             | :27              | 4                   | 82.0                | 1.51 ± 0.05  | 20.1 ± 0.71 |
| 1.50           | 20            | 93             | 207.6                  | 14.8       | 4          | 8:20                 | :40             | :40              | 4                   | 83.4                | 1.51 ± 0.06  | 19.4 ± 1.36 |
| 1.50           | 24            | 87             | 176.1                  | 17.5       | 3          | 11:00                | :40             | 1:30             | 4                   | 78.4                | 1.45 ± 0.06  | 23.2 ± 1.04 |
| 1.50           | 24            | 90             | 176.1                  | 17.5       | 3          | 11:00                | :40             | 1:30             | 4                   | 80.3                | 1.52 ± 0.16  | 24.5 ± 2.62 |
| 1.50           | 24            | 93             | 176.1                  | 17.5       | 3          | 11:00                | :40             | 1:30             | 4                   | 82.8                | 1.50 ± 0.06  | 23.8 ± 0.95 |

**Supplementary Table S1.** All brewing parameters for all samples, each sample represented by a unique combination of TDS, PE, and brewing temperature, with average measured TDS and PE and standard deviation. All brews included a 3-minute drip out period at the end of the brew. Grind size refers to setting on a Mahlkönig Guatemala Grinder, with 3 at  $770 \pm 10 \mu\text{m}$ , 4 at  $928 \pm 3 \mu\text{m}$ , and 5 at  $1115 \pm 74 \mu\text{m}$  (reference 15 from main manuscript).

| <b>Factor</b>                    | <b>df</b> | <b>F-ratio</b> | <b>P-value</b>      |
|----------------------------------|-----------|----------------|---------------------|
| <i>Temperature</i>               | 2         | 1.25           | 0.11                |
| <i>TDS</i>                       | 2         | <b>5.44</b>    | <b>&lt;0.001***</b> |
| <i>PE</i>                        | 2         | <b>2.46</b>    | <b>&lt;0.001***</b> |
| <i>Judge</i>                     | 11        | <b>52.69</b>   | <b>&lt;0.001***</b> |
| <i>Rep</i>                       | 2         | <b>4.75</b>    | <b>&lt;0.001***</b> |
| <i>Judge:Rep</i>                 | 22        | <b>3.01</b>    | <b>&lt;0.001***</b> |
| <i>Judge:Temperature</i>         | 22        | 0.96           | 0.72                |
| <i>Judge:TDS</i>                 | 22        | <b>1.98</b>    | <b>&lt;0.001***</b> |
| <i>Judge:PE</i>                  | 22        | <b>1.31</b>    | <b>&lt;0.001***</b> |
| <i>Rep:Temperature</i>           | 4         | 0.83           | 0.90                |
| <i>Rep:TDS</i>                   | 4         | 0.83           | 0.89                |
| <i>Rep:PE</i>                    | 4         | 1.12           | 0.19                |
| <i>Temperature:TDS</i>           | 4         | 1.16           | 0.14                |
| <i>Temperature:PE</i>            | 4         | 1.07           | 0.30                |
| <i>TDS:PE</i>                    | 4         | <b>1.56</b>    | <b>&lt;0.001***</b> |
| <i>Judge:Rep:Temperature</i>     | 44        | 0.98           | 0.67                |
| <i>Judge:Rep:TDS</i>             | 44        | <b>1.16</b>    | <b>&lt;0.001***</b> |
| <i>Judge:Rep:PE</i>              | 44        | <b>1.1</b>     | <b>0.015*</b>       |
| <i>Judge:Temperature:TDS</i>     | 44        | <b>1.08</b>    | <b>0.035*</b>       |
| <i>Judge:Temperature:PE</i>      | 44        | 1.02           | 0.28                |
| <i>Judge:TDS:PE</i>              | 44        | <b>1.10</b>    | <b>0.0071**</b>     |
| <i>Rep:Temperature:TDS</i>       | 8         | 1.09           | 0.18                |
| <i>Rep:Temperature:PE</i>        | 8         | 1.04           | 0.32                |
| <i>Rep:TDS:PE</i>                | 8         | 1.15           | 0.068               |
| <i>Temperature:TDS:PE</i>        | 8         | 1.10           | 0.17                |
| <i>Judge:Rep:Temperature:TDS</i> | 88        | <b>1.09</b>    | <b>&lt;0.001***</b> |
| <i>Judge:Rep:Temperature:PE</i>  | 88        | <b>1.07</b>    | <b>0.027*</b>       |
| <i>Judge:Rep:TDS:PE</i>          | 88        | 1.02           | <b>0.041*</b>       |
| <i>Judge:Temperature:TDS:PE</i>  | 88        | <b>1.10</b>    | <b>0.0022**</b>     |
| <i>Rep:Temperature:TDS:PE</i>    | 16        | 1.02           | 0.38                |

**Supplementary Table S2.** Table of F-ratios from Multivariate Analysis of Variance, significance indicated by \* ( $\alpha = 0.05$ ), with corresponding degrees of freedom (df) and p-values.

| Factor                                              | df | Nutty Aroma | Floral Aroma | Green Aroma | Bitter Taste | Sour Taste | Sweet Taste | Salty Taste | Astringent Mouthfeel | Viscous Mouthfeel | Black Tea Flavor | Berry Flavor | Dried Fruit Flavor |
|-----------------------------------------------------|----|-------------|--------------|-------------|--------------|------------|-------------|-------------|----------------------|-------------------|------------------|--------------|--------------------|
| Temperature                                         | 2  | 0.34        | 7.25*        | 0.57        | 1.36         | 0.06       | 0.75        | 0.02        | 1.37                 | 0.61              | 1.46             | 2.14         | 1.05               |
| TDS                                                 | 2  | 3.44        | 1.40         | 3.11*       | 49.20*       | 97.14*     | 4.71*       | 0.48        | 77.56*               | 28.24*            | 6.48*            | 6.64*        | 4.17*              |
| Percent.Extraction                                  | 2  | 0.051       | 1.80         | 0.89        | 1.53         | 35.04*     | 2.39        | 0.82        | 5.74*                | 2.41              | 9.80*            | 8.40*        | 0.16               |
| Rep                                                 | 2  | 0.61        | 5.12*        | 1.22        | 8.03*        | 0.44       | 2.90        | 1.63        | 0.22                 | 0.65              | 1.98             | 2.48         | 17.81*             |
| Participant.Name                                    | 11 | 122.65*     | 98.42*       | 87.64*      | 126.4*       | 129.05*    | 124.28*     | 188.39*     | 138.77*              | 66.65*            | 98.37*           | 27.91*       | 95.33*             |
| Temperature:TDS                                     | 4  | 0.336       | 0.34         | 0.98        | 0.71         | 2.30       | 0.96        | 1.16        | 0.97                 | 0.60              | 0.35             | 1.77         | 1.45               |
| Temperature:Percent.Extraction                      | 4  | 1.28        | 0.06         | 1.92        | 0.26         | 0.96       | 2.28        | 1.07        | 2.23                 | 0.77              | 0.98             | 1.19         | 1.17               |
| Temperature:Rep                                     | 4  | 0.504       | 0.91         | 1.05        | 0.61         | 0.81       | 0.71        | 0.27        | 1.04                 | 0.16              | 0.65             | 0.85         | 1.14               |
| Temperature:Participant.Name                        | 22 | 1.07        | 0.82         | 1.18        | 1.58         | 0.98       | 0.91        | 0.68        | 1.17                 | 1.26              | 1.62*            | 0.71         | 0.68               |
| TDS:Percent.Extraction                              | 4  | 1.132       | 1.04         | 1.15        | 3.43*        | 4.87*      | 1.73        | 1.90        | 1.44                 | 0.95              | 2.38             | 4.17*        | 0.40               |
| TDS:Rep                                             | 4  | 0.44        | 0.98         | 2.14        | 2.83*        | 0.62       | 0.32        | 1.05*       | 1.00                 | 1.52              | 1.61             | 0.59         | 0.95               |
| TDS:Participant.Name                                | 22 | 1.744*      | 0.60         | 1.69*       | 1.92*        | 2.78*      | 2.11*       | 2.11        | 5.56*                | 4.74*             | 2.30*            | 1.13         | 3.67*              |
| Percent.Extraction:Rep                              | 4  | 3.14*       | 0.66         | 0.90        | 1.00         | 1.39       | 2.19*       | 0.76        | 0.87                 | 1.60              | 0.74             | 0.36         | 1.64               |
| Percent.Extraction:Participant.Name                 | 22 | 0.960       | 2.83*        | 2.13*       | 1.39         | 1.75*      | 1.53        | 1.16        | 2.21*                | 2.08*             | 2.32*            | 0.85         | 1.61*              |
| Rep:Participant.Name                                | 22 | 6.45*       | 6.87*        | 5.30        | 2.47*        | 1.94*      | 3.76*       | 3.44*       | 3.56*                | 2.20*             | 2.47*            | 1.44         | 3.67*              |
| Temperature:TDS:Percent.Extraction                  | 8  | 2.26*       | 0.85         | 2.25*       | 1.18         | 0.74       | 1.11        | 1.36        | 1.00                 | 0.48              | 0.87             | 1.05         | 1.43               |
| Temperature:TDS:Rep                                 | 8  | 1.88        | 1.86         | 1.08        | 0.68         | 1.31       | 1.14        | 1.92        | 1.07                 | 0.73              | 0.88             | 0.61         | 0.94               |
| Temperature:TDS:Participant.Name                    | 44 | 1.27        | 1.49         | 1.18        | 1.02         | 0.70       | 0.95        | 2.28*       | 1.11                 | 1.04              | 0.77             | 0.88         | 0.99               |
| Temperature:Percent.Extraction:Rep                  | 8  | 1.13        | 1.16         | 1.32        | 0.68         | 0.84       | 1.50        | 0.89        | 1.26                 | 1.41              | 0.84             | 1.85         | 0.39               |
| Temperature:Percent.Extraction:Participant.Name     | 44 | 0.97        | 0.91         | 1.07        | 1.15         | 1.09       | 0.96        | 1.13        | 0.91                 | 0.69              | 0.95             | 1.31         | 1.22               |
| Temperature:Rep:Participant.Name                    | 44 | 0.90        | 0.70         | 0.99        | 1.20         | 0.97       | 0.79        | 0.66        | 1.09                 | 0.85              | 0.74             | 1.11         | 0.99               |
| TDS:Percent.Extraction:Rep                          | 8  | 0.85        | 1.00         | 1.45        | 1.49         | 1.03       | 1.14        | 1.27        | 1.42                 | 0.89              | 0.58             | 1.18         | 0.77               |
| TDS:Percent.Extraction:Participant.Name             | 44 | 1.26        | 0.95         | 1.15        | 0.93         | 0.99       | 0.85        | 1.32        | 1.19                 | 0.69              | 1.49*            | 1.69*        | 1.05               |
| TDS:Rep:Participant.Name                            | 44 | 1.68*       | 1.44         | 1.12        | 1.22         | 0.83       | 1.33*       | 1.37        | 1.23                 | 1.05              | 0.93             | 1.17         | 1.14               |
| Percent.Extraction:Rep:Participant.Name             | 44 | 1.01        | 1.36         | 1.02        | 1.06         | 1.43*      | 1.65*       | 0.68        | 1.21                 | 0.84              | 1.18             | 1.11         | 1.04               |
| Temperature:TDS:Percent.Extraction:Rep              | 16 | 0.73        | 0.88         | 1.30        | 0.98         | 1.90*      | 1.11        | 0.71        | 0.74                 | 1.47              | 0.61             | 1.78         | 1.32               |
| Temperature:TDS:Percent.Extraction:Participant.Name | 88 | 1.35*       | 1.11         | 1.02        | 1.60*        | 1.09       | 0.98        | 1.19        | 1.18                 | 1.18              | 1.36*            | 1.10         | 1.26               |
| Temperature:TDS:Rep:Participant.Name                | 88 | 1.30        | 1.84*        | 1.26        | 0.95         | 1.14       | 0.79        | 1.17        | 1.31                 | 0.94              | 1.04             | 1.32         | 1.01               |
| Temperature:Percent.Extraction:Rep:Participant.Name | 88 | 1.05        | 1.16         | 1.24        | 1.27         | 0.76       | 1.13        | 0.91        | 1.48*                | 1.01              | 0.96             | 0.85         | 1.02               |
| TDS:Percent.Extraction:Rep:Participant.Name         | 88 | 1.21        | 1.11         | 1.01        | 1.22         | 1.04       | 1.05        | 0.87        | 1.42*                | 1.14              | 0.83             | 1.16         | 1.04               |

**Supplementary Table S3.** F-ratios for univariate analysis of variance, significance indicated by \* ( $\alpha = 0.05$ ).

| <b>Factor:</b>                                             | <b>df</b> | <b>Fruity Flavor</b> | <b>Citrus Flavor</b> | <b>Fermented Flavor</b> | <b>Fresh Green Flavor</b> | <b>Dark Green Flavor</b> | <b>Woody Flavor</b> | <b>Papery/Musty Flavor</b> | <b>Rubber Flavor</b> | <b>Earthy Flavor</b> | <b>Ashy Flavor</b> |
|------------------------------------------------------------|-----------|----------------------|----------------------|-------------------------|---------------------------|--------------------------|---------------------|----------------------------|----------------------|----------------------|--------------------|
| <i>Temperature</i>                                         | 2         | 0.15                 | 0.74                 | 1.20                    | 0.38                      | 0.60                     | 0.21                | 1.51                       | 0.12                 | 0.82                 | 1.42               |
| <i>TDS</i>                                                 | 2         | 1.03                 | 70.30*               | 15.63*                  | 1.60                      | 19.38*                   | 4.30*               | 4.24*                      | 16.94*               | 6.86*                | 32.71*             |
| <i>Percent.Extraction</i>                                  | 2         | 0.22                 | 30.58*               | 7.17*                   | 1.02                      | 0.94                     | 1.94                | 3.23                       | 0.91                 | 0.43                 | 2.05               |
| <i>Rep</i>                                                 | 2         | 2.03                 | 0.34                 | 2.25                    | 3.19*                     | 12.34*                   | 1.22                | 9.88*                      | 0.19                 | 1.50                 | 12.35*             |
| <i>Participant.Name</i>                                    | 11        | 50.21*               | 112.79*              | 100.17*                 | 80.39*                    | 116.59*                  | 61.72*              | 98.94*                     | 98.88*               | 140.1*4              | 67.63*             |
| <i>Temperature:TDS</i>                                     | 4         | 0.33                 | 0.38                 | 0.25                    | 1.70                      | 2.15                     | 0.59                | 1.00                       | 0.86                 | 1.39                 | 1.47               |
| <i>Temperature:Percent.Extraction</i>                      | 4         | 0.36                 | 0.63                 | 2.14                    | 1.54                      | 1.03                     | 0.76                | 1.15                       | 0.61                 | 1.18                 | 0.98               |
| <i>Temperature:Rep</i>                                     | 4         | 1.37                 | 0.34                 | 0.34                    | 0.68                      | 0.36                     | 0.78                | 0.06                       | 1.26                 | 0.75                 | 1.05               |
| <i>Temperature:Participant.Name</i>                        | 22        | 0.75                 | 0.84                 | 0.78                    | 0.95                      | 0.57                     | 0.18                | 1.17                       | 0.61                 | 1.46                 | 0.73               |
| <i>TDS:Percent.Extraction</i>                              | 4         | 3.38*                | 1.56                 | 1.24                    | 0.55                      | 0.14                     | 0.46                | 1.05                       | 0.68                 | 1.31                 | 0.77               |
| <i>TDS:Rep</i>                                             | 4         | 0.08                 | 0.32                 | 1.87                    | 0.11                      | 0.03                     | 0.31                | 0.23                       | 0.26                 | 0.88                 | 0.26               |
| <i>TDS:Participant.Name</i>                                | 22        | 0.96                 | 2.14*                | 1.63*                   | 1.39                      | 2.87*                    | 2.56*               | 1.93*                      | 4.47*                | 2.40*                | 5.62*              |
| <i>Percent.Extraction:Rep</i>                              | 4         | 0.37                 | 0.58                 | 0.78                    | 0.11                      | 0.21                     | 0.31                | 0.44                       | 1.01                 | 0.76                 | 1.57               |
| <i>Percent.Extraction:Participant.Name</i>                 | 22        | 0.59                 | 1.56                 | 1.20                    | 0.51                      | 0.89                     | 0.44                | 0.86                       | 0.51                 | 1.22                 | 1.93*              |
| <i>Rep:Participant.Name</i>                                | 22        | 1.00                 | 2.88*                | 5.52*                   | 3.29*                     | 1.34                     | 2.12*               | 4.56*                      | 1.41                 | 6.12*                | 4.72*              |
| <i>Temperature:TDS:Percent.Extraction</i>                  | 8         | 1.80                 | 0.65                 | 1.88*                   | 0.95                      | 1.18                     | 0.30                | 0.97                       | 1.64                 | 2.60*                | 0.79               |
| <i>Temperature:TDS:Rep</i>                                 | 8         | 0.75                 | 0.36                 | 0.82                    | 1.29                      | 2.34*                    | 0.86                | 0.78                       | 0.88                 | 0.93                 | 0.60               |
| <i>Temperature:TDS:Participant.Name</i>                    | 44        | 0.62                 | 1.06                 | 0.69                    | 0.85                      | 1.41                     | 1.05                | 1.21                       | 0.86                 | 1.42*                | 0.56               |
| <i>Temperature:Percent.Extraction:Rep</i>                  | 8         | 0.42                 | 0.97                 | 0.89                    | 0.55                      | 1.15                     | 1.07                | 2.06                       | 0.83                 | 0.50                 | 0.61               |
| <i>Temperature:Percent.Extraction:Participant.Name</i>     | 44        | 0.81                 | 1.19                 | 1.52*                   | 0.95                      | 0.82                     | 0.91                | 1.25                       | 1.00                 | 0.90                 | 1.14               |
| <i>Temperature:Rep:Participant.Name</i>                    | 44        | 0.63                 | 1.06                 | 1.02                    | 0.62                      | 0.82                     | 0.87                | 0.79                       | 0.62                 | 1.35                 | 0.85               |
| <i>TDS:Percent.Extraction:Rep</i>                          | 8         | 0.86                 | 0.52                 | 0.65                    | 0.81                      | 1.37                     | 0.30                | 0.12                       | 1.06                 | 0.49                 | 0.89               |
| <i>TDS:Percent.Extraction:Participant.Name</i>             | 44        | 0.65                 | 1.04                 | 0.70                    | 0.63                      | 1.33                     | 0.82                | 1.53                       | 0.77                 | 1.74*                | 0.99               |
| <i>TDS:Rep:Participant.Name</i>                            | 44        | 1.13                 | 0.82                 | 0.98                    | 0.88                      | 1.20                     | 0.85                | 1.99*                      | 0.96                 | 0.91                 | 1.16               |
| <i>Percent.Extraction:Rep:Participant.Name</i>             | 44        | 0.70                 | 1.00                 | 0.66                    | 1.06                      | 1.07                     | 0.64                | 1.00                       | 1.36                 | 1.28                 | 1.50*              |
| <i>Temperature:TDS:Percent.Extraction:Rep</i>              | 16        | 0.93                 | 1.49                 | 0.83                    | 0.91                      | 0.84                     | 0.79                | 1.62                       | 0.97                 | 0.89                 | 0.45               |
| <i>Temperature:TDS:Percent.Extraction:Participant.Name</i> | 88        | 0.57                 | 1.04                 | 1.06                    | 0.63                      | 1.02                     | 0.73                | 1.36                       | 1.04                 | 1.44*                | 1.03               |
| <i>Temperature:TDS:Rep:Participant.Name</i>                | 88        | 0.96                 | 0.95                 | 1.85*                   | 0.79                      | 0.79                     | 0.77                | 0.78                       | 1.20                 | 1.41*                | 1.01               |
| <i>Temperature:Percent.Extraction:Rep:Participant.Name</i> | 88        | 0.93                 | 1.03                 | 1.06                    | 0.80                      | 1.04                     | 0.63                | 0.95                       | 0.86                 | 1.09                 | 0.77               |
| <i>TDS:Percent.Extraction:Rep:Participant.Name</i>         | 88        | 0.74                 | 1.05                 | 1.10                    | 0.86                      | 1.01                     | 0.73                | 1.12                       | 0.77                 | 0.85                 | 0.95               |

**Supplementary Table S3, continued.** F-ratios for univariate analysis of variance, significance indicated by \* ( $\alpha = 0.05$ ).



| <b>Factor:</b>                                             | <b>df</b> | <b>Smoky Flavor</b> | <b>Brown Roast Flavor</b> | <b>Cereal Flavor</b> | <b>Brothy Flavor</b> | <b>Brown Spice Flavor</b> | <b>Nutty Flavor</b> | <b>Dark Chocolate Flavor</b> | <b>Brown Sugar Flavor</b> | <b>Molasses Flavor</b> |
|------------------------------------------------------------|-----------|---------------------|---------------------------|----------------------|----------------------|---------------------------|---------------------|------------------------------|---------------------------|------------------------|
| <i>Temperature</i>                                         | 2         | 1.18                | 1.99                      | 0.15                 | 0.05                 | 0.29                      | 4.24*               | 1.06                         | 0.09                      | 2.08                   |
| <i>TDS</i>                                                 | 2         | 12.78*              | 23.52*                    | 2.67                 | 0.15                 | 4.79*                     | 1.23                | 12.09*                       | 4.80*                     | 8.80*                  |
| <i>Percent.Extraction</i>                                  | 2         | 1.37                | 3.42*                     | 0.90                 | 1.81                 | 0.89                      | 0.84                | 0.07                         | 0.12                      | 3.21                   |
| <i>Rep</i>                                                 | 2         | 4.92*               | 1.67                      | 1.72                 | 0.06                 | 5.36*                     | 20.10*              | 1.43                         | 0.65                      | 2.84                   |
| <i>Participant.Name</i>                                    | 11        | 61.18*              | 89.97*                    | 225.77*              | 105.53*              | 144.5*1                   | 252.51*             | 28.50*                       | 49.26*                    | 76.55*                 |
| <i>Temperature:TDS</i>                                     | 4         | 1.54                | 2.44                      | 1.13                 | 0.49                 | 3.53*                     | 0.27                | 1.84                         | 0.62                      | 0.33                   |
| <i>Temperature:Percent.Extraction</i>                      | 4         | 0.64                | 0.41                      | 0.91                 | 0.19                 | 1.28                      | 0.34                | 1.60                         | 0.63                      | 0.83                   |
| <i>Temperature:Rep</i>                                     | 4         | 0.23                | 0.78                      | 0.28                 | 0.21                 | 1.22                      | 0.36                | 0.97                         | 0.36                      | 0.65                   |
| <i>Temperature:Participant.Name</i>                        | 22        | 1.14                | 1.26                      | 0.49                 | 0.45                 | 0.90                      | 0.50                | 1.22*                        | 0.61                      | 0.43                   |
| <i>TDS:Percent.Extraction</i>                              | 4         | 1.16                | 1.12                      | 1.10                 | 1.23                 | 2.38                      | 0.57                | 3.26                         | 1.51                      | 1.38                   |
| <i>TDS:Rep</i>                                             | 4         | 1.05                | 0.30                      | 0.25                 | 0.75                 | 2.07                      | 0.45                | 0.92                         | 0.31                      | 1.00                   |
| <i>TDS:Participant.Name</i>                                | 22        | 5.44*               | 3.53*                     | 0.80                 | 0.94                 | 1.21                      | 0.98                | 4.04*                        | 2.01*                     | 4.14*                  |
| <i>Percent.Extraction:Rep</i>                              | 4         | 0.41                | 0.47                      | 1.72                 | 0.46                 | 1.55*                     | 1.22                | 1.25                         | 2.19                      | 0.48                   |
| <i>Percent.Extraction:Participant.Name</i>                 | 22        | 0.92                | 0.83                      | 1.19                 | 1.02                 | 1.65*                     | 0.77                | 1.19                         | 0.61                      | 1.67                   |
| <i>Rep:Participant.Name</i>                                | 22        | 3.48*               | 2.71*                     | 3.16*                | 1.98*                | 4.98                      | 8.60*               | 3.55*                        | 2.46*                     | 2.91*                  |
| <i>Temperature:TDS:Percent.Extraction</i>                  | 8         | 0.95                | 0.73                      | 0.28                 | 0.71                 | 0.89                      | 1.20                | 1.23                         | 0.74                      | 1.25                   |
| <i>Temperature:TDS:Rep</i>                                 | 8         | 1.14                | 1.57                      | 1.00                 | 1.18                 | 2.19*                     | 0.37                | 1.09                         | 1.35                      | 0.65                   |
| <i>Temperature:TDS:Participant.Name</i>                    | 44        | 0.93                | 1.24                      | 0.72                 | 0.69                 | 1.29                      | 0.78                | 1.07                         | 0.63                      | 0.98                   |
| <i>Temperature:Percent.Extraction:Rep</i>                  | 8         | 0.33                | 2.01                      | 0.48                 | 0.96                 | 0.33                      | 0.98                | 1.11                         | 0.73                      | 0.62                   |
| <i>Temperature:Percent.Extraction:Participant.Name</i>     | 44        | 1.06                | 0.76                      | 1.03                 | 1.04                 | 1.24                      | 0.91                | 1.10                         | 0.57                      | 0.61                   |
| <i>Temperature:Rep:Participant.Name</i>                    | 44        | 0.73                | 0.91                      | 0.75                 | 0.70                 | 0.79                      | 0.59                | 1.11                         | 1.20                      | 0.97                   |
| <i>TDS:Percent.Extraction:Rep</i>                          | 8         | 0.71                | 2.18*                     | 0.87                 | 1.04                 | 0.81                      | 1.07                | 1.71                         | 2.11                      | 1.47                   |
| <i>TDS:Percent.Extraction:Participant.Name</i>             | 44        | 1.19                | 1.24                      | 0.86                 | 0.88                 | 0.61                      | 0.81                | 1.85*                        | 0.91                      | 0.65                   |
| <i>TDS:Rep:Participant.Name</i>                            | 44        | 1.24                | 1.22                      | 0.95                 | 1.51                 | 1.07                      | 0.98                | 2.22*                        | 0.59                      | 1.39                   |
| <i>Percent.Extraction:Rep:Participant.Name</i>             | 44        | 1.33                | 1.60*                     | 0.83                 | 0.58                 | 1.55*                     | 1.03                | 1.87*                        | 1.00                      | 0.65                   |
| <i>Temperature:TDS:Percent.Extraction:Rep</i>              | 16        | 1.56                | 1.54                      | 1.08                 | 0.37                 | 1.14                      | 0.86                | 1.26                         | 0.98                      | 0.93                   |
| <i>Temperature:TDS:Percent.Extraction:Participant.Name</i> | 88        | 1.49                | 0.91                      | 0.79                 | 1.12                 | 1.19                      | 0.67                | 0.94                         | 0.68                      | 1.41                   |
| <i>Temperature:TDS:Rep:Participant.Name</i>                | 88        | 1.16                | 0.86                      | 0.79                 | 0.74                 | 0.97                      | 0.90                | 1.24                         | 0.94                      | 0.85                   |
| <i>Temperature:Percent.Extraction:Rep:Participant.Name</i> | 88        | 0.91                | 1.22                      | 0.88                 | 0.84                 | 1.01                      | 0.84                | 1.11                         | 1.10                      | 1.44                   |
| <i>TDS:Percent.Extraction:Rep:Participant.Name</i>         | 88        | 0.95                | 0.90                      | 1.07                 | 0.78                 | 0.81                      | 0.68                | 1.18                         | 1.10                      | 1.54                   |

**Supplementary Table S3, continued.** F-ratios for univariate analysis of variance, significance indicated by \* ( $\alpha = 0.05$ ).

| <b>Attribute</b>       | <b>Judge/TDS<br/>adjusted<br/>F-ratio</b> | <b>Judge/PE<br/>adjusted<br/>F-ratio</b> |
|------------------------|-------------------------------------------|------------------------------------------|
| Nutty Aroma            | 1.70                                      | 0.089                                    |
| Floral Aroma           | 2.35                                      | 0.63                                     |
| Green/Vegetative Aroma | 1.84                                      | 0.42                                     |
| Bitter Taste           | <b>25.65*</b>                             | 1.09                                     |
| Sour Taste             | <b>34.91*</b>                             | <b>20.02*</b>                            |
| Sweet Taste            | 2.23                                      | 1.57                                     |
| Salty Taste            | 0.23                                      | 0.71                                     |
| Black Tea Flavor       | 2.81                                      | <b>4.22*</b>                             |
| Berry Flavor           | <b>5.87*</b>                              | <b>9.87*</b>                             |
| Dried Fruit Flavor     | 1.14                                      | 0.098                                    |
| Fruity Flavor          | 1.07                                      | 0.37                                     |
| Citrus Flavor          | <b>32.91*</b>                             | 19.62                                    |
| Fermented Flavor       | <b>9.56*</b>                              | <b>5.99*</b>                             |
| Fresh Green Flavor     | 1.15                                      | 2.03                                     |
| Dark Green Flavor      | <b>6.74*</b>                              | 1.05                                     |
| Woody Flavor           | 1.68                                      | <b>4.43*</b>                             |
| Papery/Musty Flavor    | 2.20                                      | <b>3.75*</b>                             |
| Rubber Flavor          | <b>3.79*</b>                              | 1.80                                     |
| Earthy Flavor          | 2.86                                      | 0.35                                     |
| Ashy Flavor            | <b>5.81*</b>                              | 1.06                                     |
| Smoky Flavor           | 2.34                                      | 1.5                                      |
| Brown Roast Flavor     | <b>6.66*</b>                              | <b>4.12*</b>                             |
| Cereal Flavor          | 3.35                                      | 0.75                                     |
| Brothy Flavor          | 0.16                                      | 1.79                                     |
| Brown Spice Flavor     | 3.97*                                     | 0.54                                     |
| Nutty Flavor           | 1.25                                      | 1.09                                     |
| Dark Chocolate Flavor  | 3.00                                      | 0.060                                    |
| Brown Sugar Flavor     | 2.39                                      | 0.20                                     |
| Molasses Flavor        | 2.13                                      | 1.93                                     |
| Astringent Mouthfeel   | <b>13.95*</b>                             | 2.60                                     |
| Viscous Mouthfeel      | <b>5.95*</b>                              | 1.16                                     |

**Supplementary Table S4.** F-ratios for pseudomixed analysis of variance for Judge/TDS effect and Judge/PE effect, each with 2 degrees of freedom, significance indicated by \* ( $\alpha = 0.05$ ).

| Attribute              | Total Dissolved Solids   |                          |                          | Percent Extraction       |                          |                          | Brew Temperature         |                         |                          | Fischer's LSD |
|------------------------|--------------------------|--------------------------|--------------------------|--------------------------|--------------------------|--------------------------|--------------------------|-------------------------|--------------------------|---------------|
|                        | 1%                       | 1.25%                    | 1.50%                    | 16%                      | 20%                      | 24%                      | 87 °C                    | 90 °C                   | 93 °C                    |               |
| Nutty Aroma            | 33.4                     | 33.54                    | 35.4                     | 34.26                    | 34.18                    | 33.91                    | 33.9                     | 34.54                   | 33.91                    |               |
| Floral Aroma           | 26.52                    | 27.96                    | 27.12                    | 28.12                    | 26.9                     | 26.57                    | 28.24                    | 28.05                   | 25.31                    |               |
| Green/Vegetative Aroma | 28.68                    | 30.77                    | 28.63                    | 30.03                    | 28.73                    | 29.32                    | 28.84                    | 29.88                   | 29.36                    |               |
| Bitter Taste           | <b>35.26<sup>b</sup></b> | <b>41.68<sup>a</sup></b> | <b>43.59<sup>a</sup></b> | 39.29                    | 40.56                    | 40.67                    | 39.41                    | 40.26                   | 40.85                    | 1.74          |
| Sour Taste             | <b>33.25<sup>c</sup></b> | <b>41.1<sup>b</sup></b>  | <b>46.33<sup>a</sup></b> | <b>44.52<sup>a</sup></b> | <b>39.41<sup>b</sup></b> | <b>36.74<sup>c</sup></b> | 40.04                    | 40.33                   | 40.3                     | 1.86          |
| Sweet Taste            | 22.98                    | 21.29                    | 20.76                    | 22.62                    | 21.09                    | 21.31                    | 22.21                    | 21.46                   | 21.36                    |               |
| Salty Taste            | 13.65                    | 13.96                    | 14.13                    | 13.89                    | 14.24                    | 13.6                     | 13.94                    | 13.85                   | 13.94                    |               |
| Black Tea Flavor       | 28.09                    | 25.63                    | 25.26                    | <b>24.24<sup>b</sup></b> | <b>26.79<sup>a</sup></b> | <b>27.94<sup>a</sup></b> | 26.88                    | 25.5                    | 26.59                    | 1.67          |
| Berry Flavor           | <b>18.65<sup>b</sup></b> | <b>20.3<sup>b</sup></b>  | <b>21.6<sup>b</sup></b>  | <b>21.47<sup>a</sup></b> | <b>20.77<sup>a</sup></b> | <b>18.31<sup>b</sup></b> | 21.1                     | 19.99                   | 19.46                    | 1.66          |
| Dried Fruit Flavor     | 21.8                     | 23.56                    | 24.2                     | 23.45                    | 23.13                    | 22.98                    | 22.98                    | 23.89                   | 22.69                    |               |
| Fruity Flavor          | 17.45                    | 16.39                    | 16.54                    | 16.97                    | 16.93                    | 16.49                    | 17.03                    | 16.6                    | 16.74                    |               |
| Citrus Flavor          | <b>28.25<sup>a</sup></b> | <b>34.53<sup>b</sup></b> | <b>39.8<sup>c</sup></b>  | <b>38.41</b>             | <b>33.17</b>             | <b>31</b>                | 33.83                    | 33.87                   | 34.88                    | 1.92          |
| Fermented Flavor       | <b>13.16<sup>a</sup></b> | <b>15.07<sup>b</sup></b> | <b>16.11<sup>c</sup></b> | <b>15.95</b>             | <b>14.11</b>             | <b>14.29</b>             | 14.31                    | 14.96                   | 15.08                    | 1.06          |
| Fresh Green Flavor     | 20.95                    | 19.92                    | 19.51                    | 20.8                     | 19.67                    | 19.91                    | 19.97                    | 19.87                   | 20.54                    |               |
| Dark Green Flavor      | <b>22.65<sup>b</sup></b> | <b>27.26<sup>a</sup></b> | <b>28.04<sup>a</sup></b> | 26.67                    | 25.4                     | 25.89                    | 25.46                    | 26.48                   | 26.02                    | 1.85          |
| Woody Flavor           | 18.21                    | 19.84                    | 20.76                    | 18.73                    | 19.61                    | 20.47                    | 19.36                    | 19.53                   | 19.91                    |               |
| Papery/Musty Flavor    | 16.89                    | 18.76                    | 18.45                    | 17.07                    | 18.24                    | 18.79                    | 17.36                    | 18.23                   | 18.51                    |               |
| Rubber Flavor          | <b>13.71<sup>c</sup></b> | <b>15.8<sup>b</sup></b>  | <b>17.82<sup>a</sup></b> | 15.91                    | 15.25                    | 16.17                    | 15.81                    | 15.59                   | 15.93                    | 1.39          |
| Earthy Flavor          | <b>17.14<sup>b</sup></b> | <b>17.98<sup>b</sup></b> | <b>19.42<sup>a</sup></b> | 18.22                    | 18.44                    | 17.87                    | 17.78                    | 18.58                   | 18.18                    | 1.23          |
| Ashy Flavor            | <b>18.13<sup>c</sup></b> | <b>22.84<sup>b</sup></b> | <b>25.24<sup>a</sup></b> | 21.02                    | 22.54                    | 22.65                    | 21.27                    | 22.17                   | 22.77                    | 1.77          |
| Smoky Flavor           | 16.5                     | 18.52                    | 20.09                    | 18.9                     | 18.47                    | 17.74                    | 18.04                    | 18.07                   | 19                       |               |
| Brown Roast Flavor     | <b>29.52<sup>c</sup></b> | <b>33.16<sup>b</sup></b> | <b>35.21<sup>a</sup></b> | <b>31.37</b>             | <b>33.14</b>             | <b>33.38</b>             | 31.66                    | 33.04                   | 33.19                    | 1.7           |
| Cereal Flavor          | 21.5                     | 21.36                    | 19.94                    | 20.98                    | 21.41                    | 20.41                    | 21.07                    | 20.7                    | 21.03                    |               |
| Brothy Flavor          | 15.41                    | 15.59                    | 15.19                    | 16.14                    | 15.31                    | 14.76                    | 15.47                    | 15.26                   | 15.47                    |               |
| Brown Spice Flavor     | <b>14.34<sup>b</sup></b> | <b>14.68<sup>b</sup></b> | <b>15.79<sup>a</sup></b> | 14.95                    | 15.26                    | 14.6                     | 14.77                    | 14.91                   | 15.14                    | 0.97          |
| Nutty Flavor           | 27.52                    | 26.89                    | 26.4                     | 27.47                    | 26.59                    | 26.76                    | <b>26.07<sup>b</sup></b> | <b>28.1<sup>a</sup></b> | <b>26.65<sup>b</sup></b> | 1.42          |
| Dark Chocolate Flavor  | 19.72                    | 21.68                    | 23.46                    | 21.46                    | 21.67                    | 21.73                    | 21.06                    | 22.16                   | 21.64                    |               |
| Brown Sugar Flavor     | 19.48                    | 17.34                    | 17.17                    | 17.84                    | 18.23                    | 17.93                    | 17.8                     | 18.12                   | 18.08                    |               |
| Molasses Flavor        | 14.22                    | 15.17                    | 16.8                     | 16.12                    | 15.51                    | 14.56                    | 15.3                     | 16.07                   | 14.82                    |               |
| Astringent Mouthfeel   | <b>29.88<sup>c</sup></b> | <b>36.19<sup>b</sup></b> | <b>40.49<sup>a</sup></b> | 36.88                    | 35.7                     | 33.99                    | 35.16                    | 35.07                   | 36.34                    | 1.69          |
| Viscous Mouthfeel      | <b>29.28<sup>b</sup></b> | <b>35<sup>a</sup></b>    | <b>35.6<sup>a</sup></b>  | 32.98                    | 34.43                    | 32.47                    | 32.75                    | 33.77                   | 33.35                    | 1.83          |

**Supplementary Table S5.** Mean attribute intensities for all measured variables with Fischer's LSD significance codes, shaded by aromas, basic tastes, flavors, and mouthfeels, in order.
